# Supplementary material
Source: PubMed Central journal article supplement (PMC1317915)

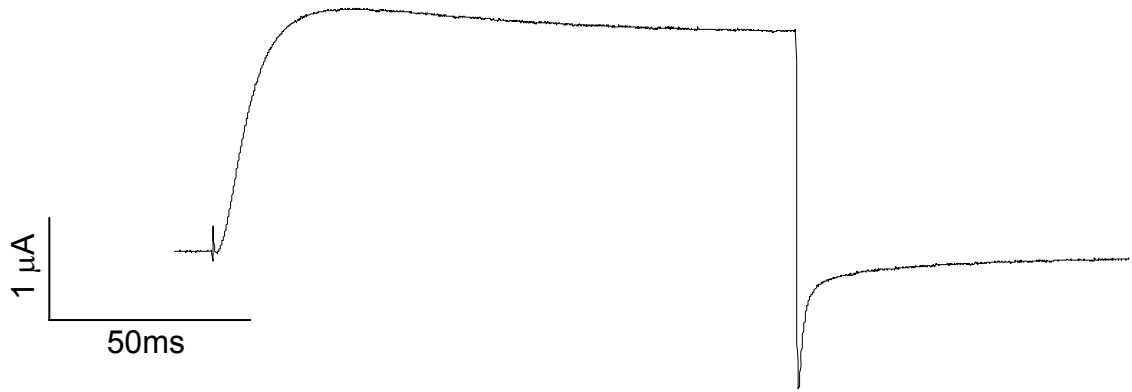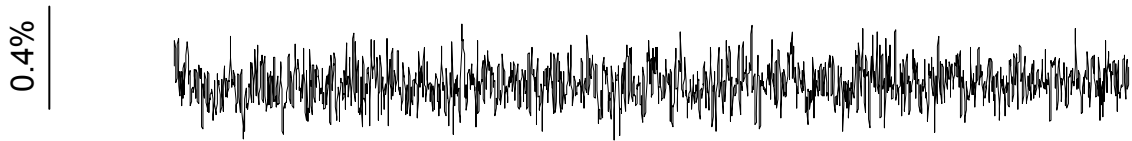

Supplement: pnas_0505766102_1.pdf [file pnas_0505766102_1.pdf]

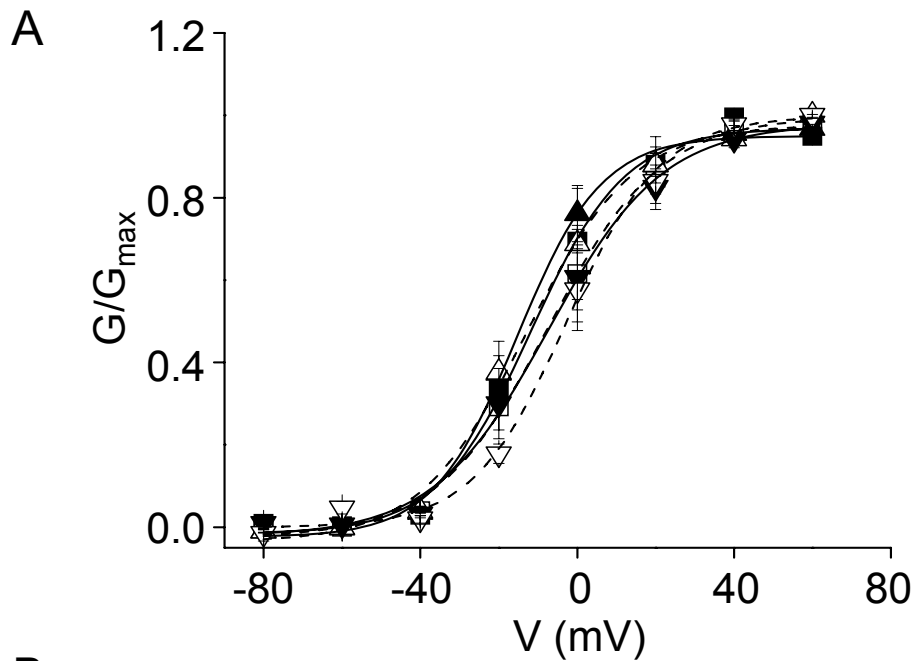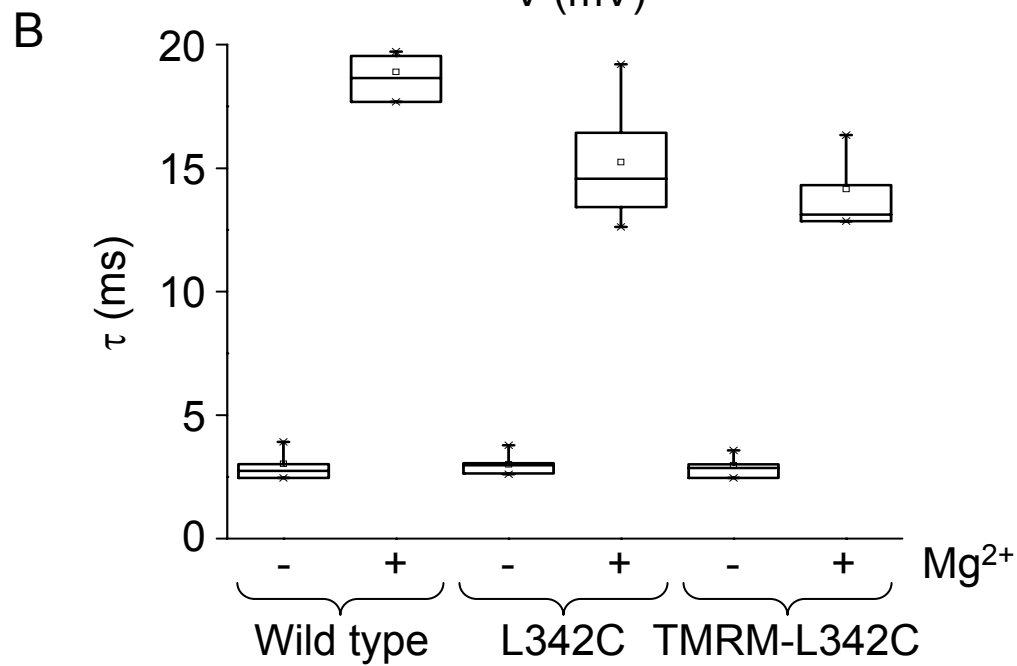

Supplement: pnas_0505766102_2.pdf [file pnas_0505766102_2.pdf]

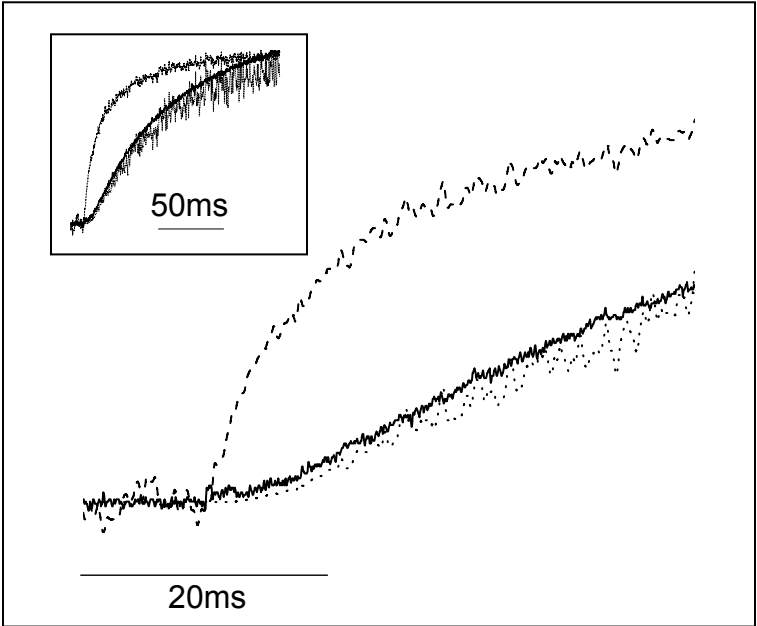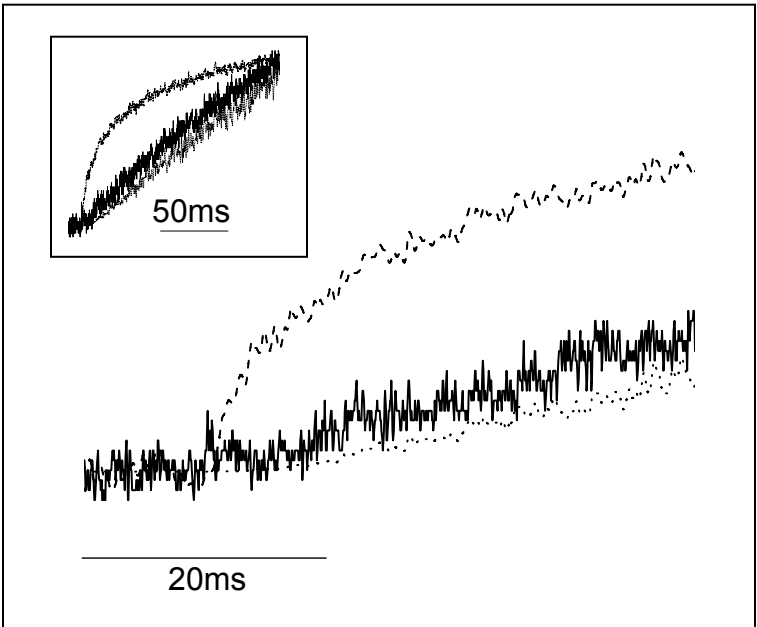

Supplement: pnas_0505766102_3.pdf [file pnas_0505766102_3.pdf]
